# Supplementary material for: Hierarchical SnO2–Fe2O3 heterostructures as lithium-ion battery anodes
Source: Royal Society of Chemistry journal article supplement (doi:10.1039/c2jm35255a), 2012-01-01
Supplement: c2jm35255a.pdf [file c2jm35255a.pdf]

## Supporting Information

# Hierarchical $\text{SnO}_2/\text{Fe}_2\text{O}_3$ Heterostructures as Lithium-Ion Battery Anodes

*Yanli Wang, Jingjie Xu, Hao Wu, Ming Xu, Zheng Peng, and Gengfeng Zheng\**

Laboratory of Advanced Materials, Department of Chemistry, Fudan University, Shanghai,  
200433, China

\* Corresponding author: [gfzheng@fudan.edu.cn](mailto:gfzheng@fudan.edu.cn) (G.Z.)

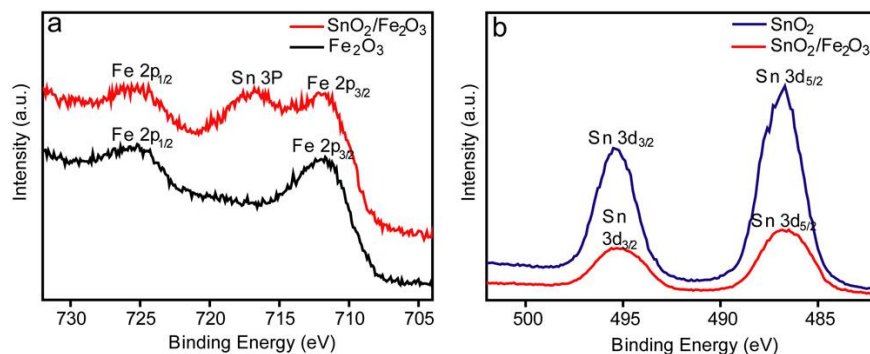

**Figure S1.** (a) Fe 2p XPS spectra collected for the SnO<sub>2</sub>/Fe<sub>2</sub>O<sub>3</sub> heterostructures (upper) and the pure Fe<sub>2</sub>O<sub>3</sub> nanorods (lower). (b) Sn 3d xps spectra collected for the SnO<sub>2</sub>/Fe<sub>2</sub>O<sub>3</sub> heterostructures (lower) and the pure SnO<sub>2</sub> nanosheets (upper). The Sn 3p spectrum of SnO<sub>2</sub>/Fe<sub>2</sub>O<sub>3</sub> heterostructures was also shown in (a).

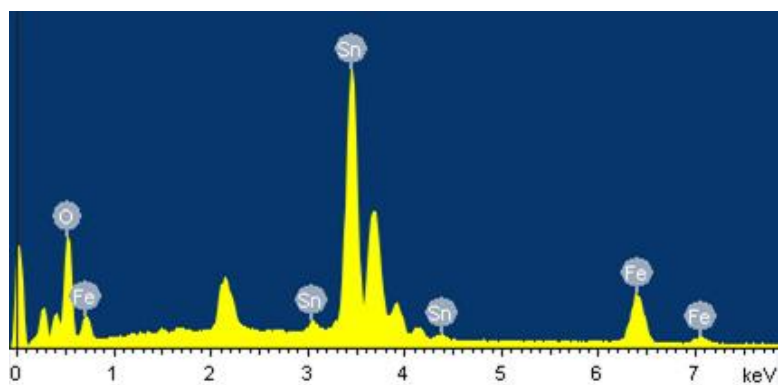

**Figure S2.** The EDX spectrum of SnO<sub>2</sub>/Fe<sub>2</sub>O<sub>3</sub> heterostructures showing a Sn/Fe ratio as 2.3 : 1.

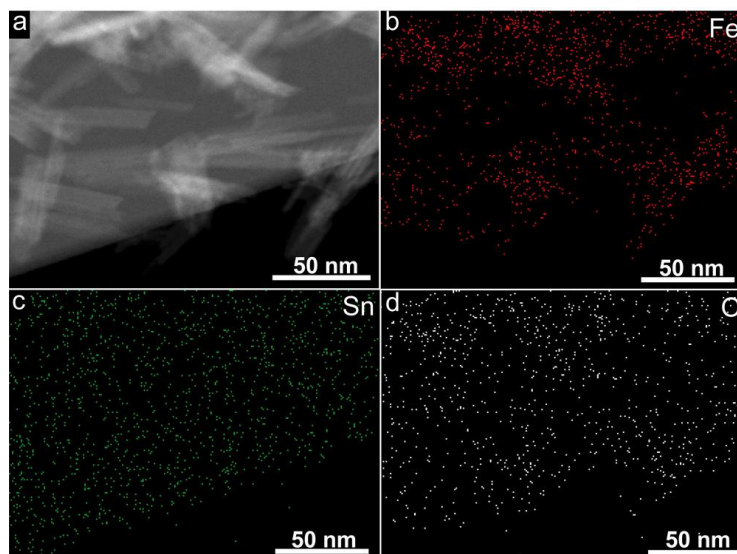

**Figure S3.** TEM images of (a) single branched nanosheet, and (b-d) the corresponding elemental mapping of Fe, Sn and O.

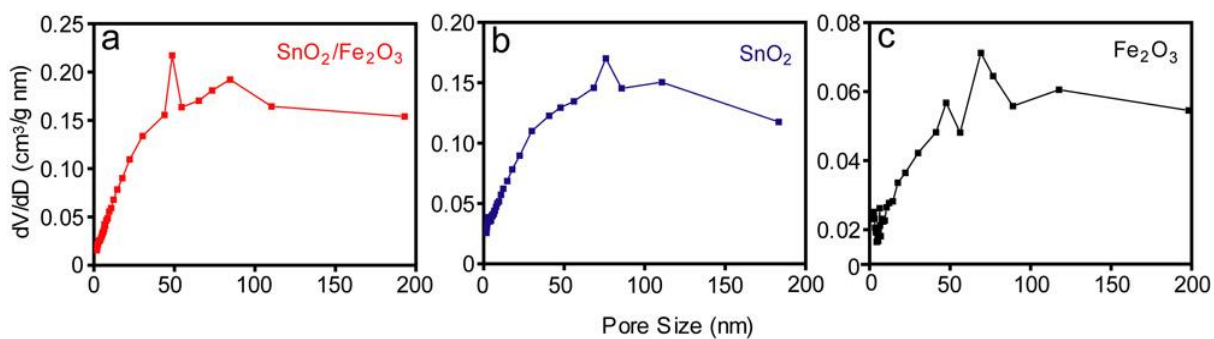

**Figure S4.** Pore size distributions calculated by the BJH method from the adsorption branch of in Figure 3: (a) SnO<sub>2</sub>/Fe<sub>2</sub>O<sub>3</sub> heterostructures; (b) SnO<sub>2</sub> nanosheets; (c) Fe<sub>2</sub>O<sub>3</sub> nanorods.

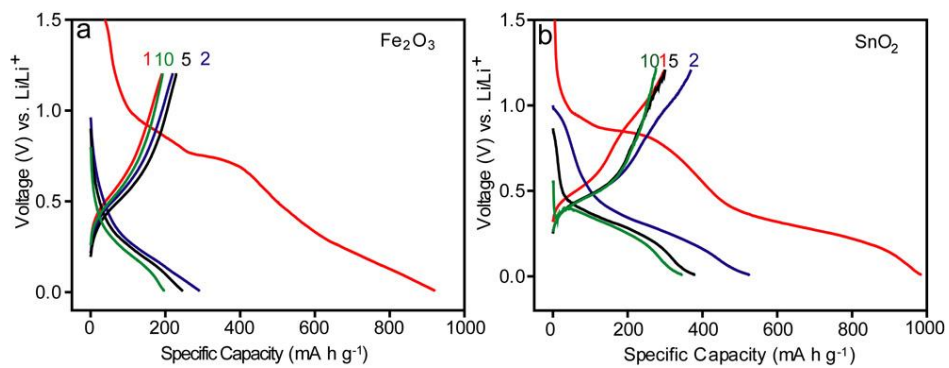

**Figure S5.** Charge-discharge profiles at a current rate of 400 mA g<sup>-1</sup> for the first, second, fifth and tenth cycles: (a) Fe<sub>2</sub>O<sub>3</sub> nanorods; (b) SnO<sub>2</sub> nanosheets.
